## Serum *N*<sup>1</sup>-Methylnicotinamide Is Associated With Obesity and Diabetes in Chinese

Ming Liu,\* Lihua Li,\* Jihong Chu, Boyu Zhu, Qingtao Zhang, Xueyan Yin, Weimin Jiang, Guoliang Dai, Wenzheng Ju, Zhenxing Wang, Qin Yang, and Zhuyuan Fang

Department of Cardiology (M.L., W.J., Z.W., Z.F.), Department of Clinical Pharmacology (J.C., G.D., W.J.), and Department of Endocrinology (B.Z.), Jiangsu Province Hospital of Traditional Chinese Medicine, The Affiliated Hospital of Nanjing University of Traditional Chinese Medicine, Nanjing 210029, Jiangsu, China; Department of Medicine, Physiology and Biophysics, Center for Diabetes Research and Treatment, Center for Epigenetics and Metabolism (M.L., Q.Y.), University of California Irvine, Irvine, California 92697; and Department of Internal Medicine (L.L., Q.Z., X.Y.), Dali University School of Clinical Medicine, Dali 671003, Yunnan, China

**Context:** Nicotinamide *N*-methyltransferase (NNMT) is a novel histone methylation modulator that regulates energy metabolism, and NNMT knockdown prevents diet-induced obesity in mice. However, whether NNMT plays a role in human obesity and type 2 diabetes (T2DM) remains to be elucidated.

**Objective:** NNMT catalyzes methylation of nicotinamide to generate *N*<sup>1</sup>-methylnicotinamide (me-NAM). We aimed to investigate the associations of serum me-NAM with obesity and T2DM in Chinese.

**Design, Setting, and Participants:** The study subjects (n = 1160) were recruited from Dali, a city of Yunnan Province, in southwest China. Anthropometric phenotypes, fasting glucose, and serum lipids were measured. Serum me-NAM was measured by liquid chromatography-mass spectrometry.

**Results:** Serum me-NAM was positively correlated with body mass index and waist circumference and negatively with high-density lipoprotein ( $P \leq .03$ ). The correlations remained highly significant in the multivariate adjusted correlation analyses. In men (n = 691), positive correlations between me-NAM and fasting glucose, low-density lipoprotein, liver function, and serum creatinine levels were also observed in both simple and multivariate adjusted correlation analyses. In multiple logistic regression analyses, elevated serum me-NAM was associated with higher risks for overweight/obesity (odds ratios, 2.36 and 5.78; 95% confidence intervals, 1.10–5.08 and 1.78–18.76 for men and women, respectively;  $P \leq .03$ ) and diabetes (odds ratios, 1.56 and 1.86; 95% confidence intervals, 1.10–2.22 and 1.05–3.31 for men and women, respectively;  $P \leq .03$ ).

**Conclusions:** This first large-scale population study shows that me-NAM, as an indicator of NNMT activity, is strongly associated with obesity and diabetes, supporting NNMT as a potential target for treating obesity and diabetes in humans. (*J Clin Endocrinol Metab* 100: 3112–3117, 2015)

Obesity and overweight pose a major risk for the development of type 2 diabetes (T2DM), cardiovascular disease, hypertension, and stroke (1). Obesity and

diabetes epidemics are not restricted to industrialized societies. In developing countries, especially those with rapid economic growth such as China and India, the obesity rate

ISSN Print 0021-972X ISSN Online 1945-7197

Printed in USA

Copyright © 2015 by the Endocrine Society

Received March 21, 2015. Accepted June 9, 2015.

First Published Online June 12, 2015

\* M.L. and L.L. contributed equally to the study.

Abbreviations: ALT, alanine aminotransferase; BMI, body mass index; BP, blood pressure; CI, confidence interval; GGT,  $\gamma$ -glutamyltransferase; HDL, alanine aminotransferase; LDL, low-density lipoprotein; me-NAM, *N*<sup>1</sup>-methylnicotinamide; OR, odds ratio; SAM, S-adenosylmethionine; NNMT, *N*-methyltransferase; T2DM, type 2 diabetes.

has increased sharply over the past 20 to 30 years (2). Environmental factors such as lifestyle changes are clearly the primary driving force for the obesity epidemic. Unmatched energy expenditure with increased energy intake is a fundamental mechanism for the development of obesity (3). Although genetic variants are important for regulating energy metabolism, they do not appear to explain the obesity prevalence in recent decades. It is increasingly recognized that epigenetic mechanisms such as DNA and histone methylation may be key in orchestrating environmental factors, gene expression, and energy metabolism in obesity development (4, 5). Because epigenetic markers are potentially reversible pharmacologically, the epigenome has become an attractive target for treating obesity and T2DM.

It was recently revealed that nicotinamide *N*-methyltransferase (NNMT) is a novel modulator of histone methylation and plays an important role in regulating cellular energy metabolism (6). NNMT is the only enzyme that catabolizes nicotinamide (vitamin B<sub>3</sub>) by transferring a methyl group from *S*-adenosylmethionine (SAM) to nicotinamide (7, 8). The enzymatic reaction generates *N*<sup>1</sup>-methylnicotinamide (me-NAM) and *S*-adenosylhomocysteine (SAH), a precursor of homocysteine (7, 8). NNMT is probably a major methyltransferase in adipose tissue because NNMT knockdown significantly increases adipose SAM levels and the SAM/SAH ratio (6). This in turn promotes the methylation of lysine 4 on histone 3. The altered histone methylation further modulates downstream target genes including the key enzymes involved in polyamine flux, thus enhancing energy consumption. Consequently, NNMT knockdown in adipose tissue and liver protects against diet-induced obesity and its deteriorating metabolic disorders (6).

A more recently study shows that adipose NNMT expression is increased in T2DM, and NNMT levels correlate positively with insulin resistance (9). More importantly, interventions that improve insulin sensitivity by exercising and bariatric surgery are associated with a significant reduction in adipose NNMT expression (9). These results suggest that NNMT may play important roles in obesity and T2DM in humans. However, measuring NNMT expression in adipose tissue and/or liver in humans has limitations and is usually not practical for epidemiological studies. me-NAM has been used as an indicator of NNMT activity because it can only be generated by NNMT. Serum and urine me-NAM can be measured using mass spectrometry (10). Both serum and urinary me-NAM levels have been shown to be elevated in obesity and T2DM in humans (9, 11). However, there are no large-scale population studies to establish the association of me-NAM with obesity and T2DM. Therefore, we

measured me-NAM levels in 1160 Chinese and investigated its associations with obesity and T2DM.

## Subjects and Methods

### Study population

Subjects were recruited in the framework of a cross-sectional population-based study in hypertension and metabolic syndrome, as reported previously (12, 13). From March to May 2010, we invited all employees and retired workers of a factory in Dali County (25°N), Yunnan Province, China, to participate the study. Of the 1643 invited, 1443 (87.8%) participated. We excluded 283 subjects from the present analyses because of inadequate blood samples for me-NAM measurements (*n* = 260) or missing information on demographic data (*n* = 15), plasma glucose (*n* = 1), or serum lipids (*n* = 7). Thus, the total number of subjects in the present analyses was 1160. All subjects gave written informed consent. The study protocol was approved by the ethic committee of the Affiliated Hospital of Dali University.

### Anthropometric and biochemical measurements

Sociodemographics, medical history, smoking and drinking habits, and the use of medications were documented with a standardized questionnaire. Body weight, body height, waist and hip circumference, and blood pressure (BP) were measured by an experienced nurse. Body mass index (BMI) was calculated as weight in kilograms divided by height in meters squared. Three sitting BP measurements taken consecutively at 5-minute intervals using an automated electronic device (Omron HEM 7011) were averaged for analysis. Venous blood samples were taken after overnight fasting for the measurement of plasma glucose, serum creatinine, total cholesterol, high-density lipoprotein (HDL) cholesterol, low-density lipoprotein (LDL) cholesterol, triglycerides, alanine aminotransferase (ALT), and  $\gamma$ -glutamyltransferase (GGT). Serum samples were subsequently stored in aliquots at  $-30^{\circ}\text{C}$  for measurements of me-NAM.

Serum me-NAM concentrations were determined by liquid chromatography with tandem mass spectrometry (Agilent 6430 Triple Quad liquid chromatograph/mass spectrometer) with a modification of the method described by Szafarz et al (10) in the Clinical Pharmacology Laboratory, Jiangsu Province Hospital of Traditional Chinese Medicine. The intra- and interassay coefficients of variance were 3.69% and 4.95%, respectively, for me-NAM. The analytic sensitivity of the assays for measuring me-NAM was 2.5 ng/mL.

Overweight was defined as a BMI of 24 to  $<28\text{ kg/m}^2$ , and obesity was defined as a BMI of at least  $28\text{ kg/m}^2$  according to Chinese criteria (14). Diabetes mellitus was defined as a fasting plasma glucose of at least 7.0 mmol/L or as the use of antidiabetic agents. Hypertension was defined as a BP of at least 140 mm Hg systolic or 90 mm Hg diastolic or as the use of antihypertensive drugs.

### Statistical methods

We used SAS version 9.2 (SAS Institute) for database management and statistical analyses. Data are presented as means  $\pm$  SD or medians (25th and 75th percentiles) for continuous variables or as percentages for categorical variables. Departure from normality was tested by the Shapiro-Wilks statistic. Serum me-

**Table 1.** Characteristics of Participants

| Characteristic                        | Men (n = 691)    | Women (n = 469)  | P     |
|---------------------------------------|------------------|------------------|-------|
| Age, y                                | 50.5 ± 13.4      | 49.3 ± 12.4      | .13   |
| BMI, kg/m <sup>2</sup>                | 24.0 ± 3.2       | 23.0 ± 3.4       | <.001 |
| Waist circumference, cm               | 82.2 ± 8.9       | 74.5 ± 9.6       | <.001 |
| Systolic BP, mm Hg                    | 130.7 ± 19.9     | 125.5 ± 21.7     | <.001 |
| Current smoking, n (%)                | 400 (57.9)       | 7 (1.5)          | <.001 |
| Alcohol intake, n (%)                 | 250 (36.2)       | 9 (1.9)          | <.001 |
| Overweight/obese, n (%)               | 339 (49.1)       | 162 (34.5)       | <.001 |
| Diabetes mellitus, n (%)              | 65 (9.4)         | 36 (7.7)         | .30   |
| Taking antihyperglycemic drugs, n (%) | 47 (6.8)         | 24 (5.1)         | .24   |
| Plasma glucose, mmol/L                | 5.47 ± 1.78      | 5.30 ± 1.50      | .07   |
| Total cholesterol, mmol/L             | 5.50 ± 0.99      | 5.47 ± 1.01      | .53   |
| LDL cholesterol, mmol/L               | 3.29 ± 0.86      | 3.23 ± 0.91      | .29   |
| HDL cholesterol, mmol/L               | 1.25 ± 0.32      | 1.47 ± 0.35      | <.001 |
| Triglycerides, mmol/L                 | 1.94 (1.28–2.92) | 1.45 (1.02–2.15) | <.001 |
| ALT, U/L                              | 28 (20–41)       | 18 (14–26)       | <.001 |
| GGT, U/L                              | 34 (22–61)       | 16 (11–26)       | <.001 |
| Serum creatinine, μmol/L              | 85.2 ± 14.7      | 62.5 ± 12.6      | <.001 |
| me-NAM, ng/mL                         | 12.5 (9.0–17.6)  | 11.7 (8.3–15.9)  | .002  |

Data are means ± SD, median with interquartile range in parentheses, or number with percentage in parentheses.

NAM, triglyceride, ALT, and GGT concentrations were not normally distributed and were, therefore, logarithmically transformed for statistical analyses. Means and proportions were compared with the Student *t* test and the Fisher exact test, respectively. Relationships among me-NAM, age, BMI, waist and hip circumference, BP, liver enzymes, renal function, fasting plasma glucose, and serum lipids were examined by calculation of partial correlation coefficients. We then performed multiple logistic regression analyses to evaluate the odds ratios (ORs) and 95% confidence intervals (CIs) of having overweight/obesity and diabetes for each 1-unit increase in the logarithmically transformed me-NAM. Spearman correlation and logistic regression analyses with nontransformed me-NAM were also performed. A two-sided value of  $P < .05$  was considered statistically significant.

## Results

### Characteristics of the study participants

The 1160 participants (mean age, 50.0 ± 13.0 years) included 691 men (59.6%), 397 overweight participants (34.2%), 104 obese participants (9.0%), and 101 participants with T2DM (8.7%). Table 1 summarizes the characteristics of the study participants by sex. Men and women had similar ages, rates for diabetes or for taking antihyperglycemic drugs, plasma glucose, and total and LDL cholesterol levels. Men had a greater BMI (+1.0 kg/m<sup>2</sup>) and waist circumference (+7.7 cm), higher systolic BP (+5.2 mm Hg), higher serum creatinine (+22.7 μmol/L), ALT (+10 U/L), and GGT (+18 U/L), higher serum triglycerides (+0.49 mmol/L), lower serum HDL cholesterol concentrations (−0.22 mmol/L), and higher proportions of current smoking (57.9% vs 1.5%) and alcohol intake (36.2% vs 1.9%). In addition, men, compared with

women, had higher serum me-NAM concentrations (12.5 vs 11.7 ng/mL;  $P = .002$ ).

### Association of me-NAM with clinical parameters

We next investigated the relationship of serum me-NAM levels with various anthropometric and laboratory parameters. Serum me-NAM, triglyceride, ALT, and GGT levels were not normally distributed by the Shapiro-Wilks statistic (Supplemental Table 1). This can also be seen in the histogram and quantile-quantile plots for me-NAM (Supplemental Figure 1, A and B) and triglycerides, ALT, and GGT (not shown). After log transformation, me-NAM distribution was markedly improved and became virtually linear (Supplemental Figure 1, C and D). Thus, these parameters were logarithmically transformed for partial Pearson correlations. Serum me-NAM concentrations were positively associated with BMI and waist and hip circumference ( $r = 0.09–0.22$ ;  $P \leq .04$ ) and negatively with HDL cholesterol ( $r = -0.09$  to  $-0.18$ ;  $P < .05$ ) in both men and in women (Table 2). In men, serum me-NAM levels were also positively associated with serum LDL cholesterol, triglycerides, fasting plasma glucose, ALT and GGT, and serum creatinine ( $r = 0.10–0.11$ ;  $P \leq .01$ ) (Table 2). All of these correlations remained statistically significant ( $P \leq .02$ ) except for triglycerides and GGT after adjustments for age, current smoking, alcohol intake, BMI, systolic BP, serum ALT and GGT, creatinine, fasting plasma glucose, total and LDL cholesterols, and triglycerides, as appropriate (Table 2). Similar results were obtained for Spearman rho correlation analysis using non-log transformed clinical parameters (Supplemental Table 2).

**Table 2.** Simple and Multivariate Adjusted Correlations Between me-NAM and Clinical Parameters by Sex

|                                    | Serum me-NAM, ng/mL, log <sup>a</sup> |          |                  |          |                 |          |                  |          |
|------------------------------------|---------------------------------------|----------|------------------|----------|-----------------|----------|------------------|----------|
|                                    | Men (n = 691)                         |          |                  |          | Women (n = 469) |          |                  |          |
|                                    | <i>r</i>                              | <i>P</i> | Partial <i>r</i> | <i>P</i> | <i>r</i>        | <i>P</i> | Partial <i>r</i> | <i>P</i> |
| Age, y                             | −0.02                                 | .62      | 0.04             | .31      | −0.01           | .83      | −0.02            | .70      |
| Systolic BP, mm Hg                 | −0.06                                 | .10      | −0.07            | .08      | 0.02            | .61      | −0.01            | .85      |
| BMI, kg/m <sup>2</sup>             | 0.22                                  | <.001    | 0.15             | <.001    | 0.13            | .004     | 0.14             | .002     |
| Waist circumference, cm            | 0.22                                  | <.001    | 0.14             | <.001    | 0.09            | .04      | 0.10             | .03      |
| Hip circumference, cm              | 0.22                                  | <.001    | 0.15             | <.001    | 0.12            | .008     | 0.13             | .007     |
| Fasting plasma glucose, mmol/L     | 0.11                                  | .003     | 0.11             | .005     | 0.05            | .24      | 0.05             | .24      |
| Total cholesterol, mmol/L          | 0.05                                  | .15      | 0.03             | .51      | −0.02           | .69      | −0.007           | .89      |
| LDL cholesterol, mmol/L            | 0.11                                  | .005     | 0.09             | .02      | 0.04            | .38      | 0.04             | .05      |
| HDL cholesterol, mmol/L            | −0.18                                 | <.001    | −0.12            | .002     | −0.09           | <.05     | −0.13            | .007     |
| Triglycerides, mmol/L <sup>a</sup> | 0.09                                  | .02      | −0.01            | .72      | −0.07           | .12      | −0.11            | .02      |
| ALT, U/L <sup>a</sup>              | 0.21                                  | <.001    | 0.15             | <.001    | 0.05            | .27      | 0.02             | .63      |
| GGT, U/L <sup>a</sup>              | 0.10                                  | .008     | 0.06             | .10      | 0.02            | .71      | 0.01             | .86      |
| Serum creatinine, μmol/L           | 0.10                                  | .01      | 0.10             | .006     | 0.03            | .54      | 0.03             | .56      |

<sup>a</sup> Log-transformed variable. First, we performed sex-specific simple correlation analyses to identify potential variables correlated with the serum me-NAM concentration. We further performed sex-specific multivariate adjusted correlation analyses of the relationship between me-NAM and clinical parameters, while controlling for the above-identified correlates, as appropriate.

### Association of me-NAM with obesity and diabetes

We next performed multiple logistic regression analysis to investigate whether me-NAM levels were associated with the risks for obesity and T2DM. Because men and women had different BMI and waist circumference, but similar diabetes prevalence (Table 1), we performed logistic regression analysis for obesity and T2DM in all subjects as well as in men and women separately. After adjustment for potential confounders (ie, age, sex, current smoking and alcohol intake, serum ALT and GGT, creatinine, fasting plasma glucose, total and LDL cholesterol, triglycerides, and systolic BP), elevated serum me-NAM concentrations were significantly associated with higher risks for overweight/obesity in all subjects (OR, 3.04; 95% CI, 1.61–5.73; *P* < .001), men (OR, 2.36; 95% CI, 1.10–5.08; *P* = .03), and women (OR, 5.78; 95% CI, 1.78–18.76; *P* = .004), respectively (Table 3). Similarly, me-NAM was significantly associated with higher risk for T2DM in all subjects (OR, 1.53; 95% CI, 1.14–2.05; *P* = .005), men (OR, 1.56; 95% CI, 1.10–2.22; *P* = .01), and women (OR, 1.86; 95% CI, 1.05–3.31; *P* = .03), respectively (Table 3). Similar trend and significance were ob-

tained when we performed logistic regression using non-transformed me-NAM, although the OR of obesity was weaker (Supplemental Table 3).

### Discussion

We found that serum me-NAM, an indicator of NNMT activity, is strongly associated with obesity and T2DM at a large-scale population level. Among 1160 Chinese adults in our study, high serum me-NAM concentrations are associated with an approximate 2-fold increase in the risk for obesity and a 53% higher risk for T2DM. Another interesting finding of the present study is that me-NAM negatively correlates with HDL, independent of body weight, diabetes, and other risk factors.

Until now, there have been 3 small studies that investigated me-NAM levels in obesity and T2DM. The first untargeted metabolomic analyses revealed high urinary me-NAM in humans with T2DM (11). The second study showed that me-NAM levels are higher in individuals with T2DM than in healthy control subjects 5 hours after a

**Table 3.** Associations of Serum me-NAM Concentrations With Obesity and Diabetes

|                    | Serum me-NAM (+1 ng/mL), log |          |                  |          |                   |          |
|--------------------|------------------------------|----------|------------------|----------|-------------------|----------|
|                    | All (n = 1160)               |          | Men (n = 691)    |          | Women (n = 469)   |          |
|                    | OR (95% CI)                  | <i>P</i> | OR (95% CI)      | <i>P</i> | OR (95% CI)       | <i>P</i> |
| Overweight/obesity | 3.04 (1.61–5.73)             | <.001    | 2.36 (1.10–5.08) | .03      | 5.78 (1.78–18.76) | .004     |
| Diabetes           | 1.53 (1.14–2.05)             | .005     | 1.56 (1.10–2.22) | .01      | 1.86 (1.05–3.31)  | .03      |

In a multiple logistic regression model, ORs (95% CIs) were adjusted for age, sex (not in men and women), BMI (not for overweight/obesity), systolic BP, current smoking and alcohol intake, fasting plasma glucose (not for diabetes), serum ALT and GGT, creatinine, total and LDL cholesterol, and triglycerides.



100-mg nicotinamide challenge (15). However, this smaller ( $n = 28$ ) study did not find a statistical difference in me-NAM levels between T2DM and control subjects before the nicotinamide challenge, and BMI of the subjects was not reported. More recently, Kannt et al (9) measured me-NAM levels in 111 subjects without T2DM and 88 subjects with T2DM and demonstrated that me-NAM levels significantly correlated with the degree of insulin resistance in type 2 diabetes. The study did not report whether me-NAM was correlated with BMI in all subjects studied. Adipose NNMT mRNA levels, which correlate with serum me-NAM only in subjects with a BMI of  $>39$  kg/m<sup>2</sup>, are not associated with BMI. In our study, however, we observed that me-NAM strongly associated with BMI. This finding is consistent with the biological roles of NNMT in regulating energy expenditure in mouse studies (6). The discrepancies in association of me-NAM with obesity between our study and that of Kannt et al (9) may be due to several important factors including study design, sample size, obesity severity, and ethnicity. First, our study was population-based with 1160 subjects, which provided the possibility of finding context-dependent associations. Second, the mean BMI was 33 kg/m<sup>2</sup> in control subjects and 49 kg/m<sup>2</sup> in diabetic subjects in the cohort of Kannt et al. On the other hand, the mean BMI in our study was 23 to 24 kg/m<sup>2</sup>. Finally, the prevalence of abdominal obesity is higher (2, 16), whereas nonalcoholic fatty liver disease is lower in Chinese (12.5%–24.5%) (17–19) than in Caucasians (33%–44%) (20, 21). It is possible that me-NAM levels in our cohort are less affected by hepatic NNMT activity. Further studies with more detailed clinical parameters, especially body composition and fatty liver index, will be helpful to clarify the associations of NNMT activity with adiposity and severity of fatty liver.

Another interesting observation of the current study is a negative correlation between me-NAM and HDL cholesterol, independent of other risk factors, in the general population. It has long been known that elevated homocysteine, another product of NNMT activity, is associated with low HDL (22) and cardiovascular disease (23). It is thought that elevated homocysteine may contribute to the development of cardiovascular disease. However, homocysteine lowering does not prevent cardiovascular disease or reduce all-cause mortality in patients with vascular disease or in primary prevention (24). Now our data show that me-NAM is also associated with low HDL. It is possible that increased NNMT activity, rather than elevated homocysteine levels, may contribute to low HDL and cardiovascular risk. In fact, hepatic NNMT activity increases by  $>2$ -fold in apolipoprotein-E/LDL receptor double knockout mice compared with that in control mice (25). Further studies are necessary to determine whether inhi-

biton of NNMT activity may increase HDL levels and improve cardiovascular disease.

The mechanisms for increased NNMT activity and me-NAM levels in obesity and T2DM are unclear. NNMT is activated by its substrate, nicotinamide (26). Nicotinamide overload induces higher plasma me-NAM levels in individuals with T2DM than in healthy control subjects (15). In addition, treating mice with high-dose nicotinic acid activates NNMT in adipose tissue (8). Interestingly, there is an association between the timing of mandatory dietary nicotinamide (vitamin B<sub>3</sub>) supplements and the timing of increased prevalence of obesity and T2DM (15). However, nicotinamide levels did not correlate with BMI, glucose, and lipid levels in our study (data not shown). This, however, does not rule out a potential role of nicotinamide in NNMT activation in obesity and T2DM because nicotinamide, as a precursor of NAD<sup>+</sup>, is dynamically changed with NAD<sup>+</sup> synthesis and catabolism (27). NNMT expression and activity, especially in adipose tissue, appear to be regulated by nutritional status such as a high-fat diet. Further studies on the associations between nutritional factors such as trans fat (28, 29) and sugar-sweetened beverage (30) intake with NNMT activity will provide significant insights into the mechanisms for the regulation of NNMT activity. Nutrients can reverse or change epigenetic phenomena such as histone modifications, thereby modifying the expression of critical genes associated with energy expenditure. Because NNMT regulates the availability of the methyl group and affects histone methylation and downstream gene expression (6), NNMT may be a key mechanism linking nutrients, epigenetic regulation, and energy metabolism in the development of obesity.

Our study should be interpreted within the context of its limitations. The cross-sectional design does not allow causal inference. In addition, the association of serum me-NAM with obesity and diabetes was not a prespecified endpoint for the subjects recruited in the study.

In summary, our first large-scale population study shows significant associations of serum me-NAM with obesity and diabetes in Chinese. In addition, me-NAM negatively correlates with HDL. Although prospective and interventional studies are necessary to investigate whether elevated NNMT activity may play a causal role in obesity and T2DM in humans, our findings provide novel insights into the potential roles of NNMT in obesity, diabetes, lipid disorders, and cardiovascular disease.

## Acknowledgments

We gratefully acknowledge the voluntary participation of all study subjects. We also thank Changyin Li, Shijia Liu, and Mei-

juan Xu, Jiangsu Province Hospital of Traditional Chinese Medicine, for their assistance in  $N^1$ -methylnicotinamide measurements. Frank Hu at the Harvard School of Public Health and Zhaoxia Yu at the Department of Statistics of University of California, Irvine provided valuable suggestions on statistical analyses.

Address all correspondence and requests for reprints to: Zhuyuan Fang, MD, PhD, Department of Cardiology, Jiangsu Province Hospital of Traditional Chinese Medicine, 155 Hanzhong Road, Nanjing, Jiangsu Province 210029, China. E-mail: [jsszyfzy@163.com](mailto:jsszyfzy@163.com); or Qin Yang, MD, PhD, Department of Medicine, Physiology and Biophysics, Room 316, Sprague Hall, University of California, Irvine, Irvine, CA 92697. E-mail: [qin.yang@uci.edu](mailto:qin.yang@uci.edu).

This work was supported by the National Natural Science Foundation of China (Grant 81273713), the PhD Programs Foundation of Ministry of Education of China (Grant 20123237110005), and Social Development Programs of Science and Technology Commission Foundation of Jiangsu Province (Grant BE2009696 to Z.F.), the National Natural Science Foundation of China (Grants 30960137 and 81460084) and Doctoral Funding of Dali University (Grant KY141926110 to L.L.), and the National Institutes of Health (Grant R01 DK100385 to Q.Y.).

Disclosure Summary: The authors have nothing to disclose.

## References

- Hruby A, Hu FB. The epidemiology of obesity: a big picture [published online ahead of print December 4, 2014]. *Pharmacoeconomics*.
- Hu FB. Globalization of diabetes: the role of diet, lifestyle, and genes. *Diabetes Care*. 2011;34:1249–1257.
- Hill JO, Wyatt HR, Peters JC. Energy balance and obesity. *Circulation*. 2012;126:126–132.
- Drong AW, Lindgren CM, McCarthy MI. The genetic and epigenetic basis of type 2 diabetes and obesity. *Clin Pharmacol Ther*. 2012;92:707–715.
- Teperino R, Schoonjans K, Auwerx J. Histone methyl transferases and demethylases; can they link metabolism and transcription? *Cell Metab*. 2010;12:321–327.
- Kraus D, Yang Q, Kong D, et al. Nicotinamide N-methyltransferase knockdown protects against diet-induced obesity. *Nature*. 2014;508:258–262.
- Aksoy S, Szumlanski CL, Weinshilboum RM. Human liver nicotinamide N-methyltransferase. cDNA cloning, expression, and biochemical characterization. *J Biol Chem*. 1994;269:14835–14840.
- Riederer M, Erwa W, Zimmermann R, Frank S, Zechner R. Adipose tissue as a source of nicotinamide N-methyltransferase and homocysteine. *Atherosclerosis*. 2009;204:412–417.
- Kannt A, Pfenninger A, Teichert L, et al. Association of nicotinamide-N-methyltransferase mRNA expression in human adipose tissue and the plasma concentration of its product, 1-methylnicotinamide, with insulin resistance. *Diabetologia*. 2015;58:799–808.
- Szafarz M, Lomnicka M, Sternak M, Chlopicki S, Szymura-Oleksiak J. Simultaneous determination of nicotinic acid and its four metabolites in rat plasma using high performance liquid chromatography with tandem mass spectrometric detection (LC/MS/MS). *J Chromatogr B Analyt Technol Biomed Life Sci*. 2010;878:895–902.
- Salek RM, Maguire ML, Bentley E, et al. A metabolomic comparison of urinary changes in type 2 diabetes in mouse, rat, and human. *Physiol Genomics*. 2007;29:99–108.
- Li L, Yin X, Yao C, Zhu X, Wu X. Vitamin D, parathyroid hormone and their associations with hypertension in a Chinese population. *PLoS One*. 2012;7:e43344.
- Li LH, Yin XY, Yao CY, Zhu XC, Wu XH. Serum 25-hydroxyvitamin D, parathyroid hormone, and their association with metabolic syndrome in Chinese. *Endocrine*. 2013;44:465–472.
- Zhou BF. Predictive values of body mass index and waist circumference for risk factors of certain related diseases in Chinese adults—study on optimal cut-off points of body mass index and waist circumference in Chinese adults. *Biomed Environ Sci*. 2002;15:83–96.
- Zhou SS, Li D, Sun WP, et al. Nicotinamide overload may play a role in the development of type 2 diabetes. *World J Gastroenterol*. 2009;15:5674–5684.
- Du T, Sun X, Yin P, Huo R, Ni C, Yu X. Increasing trends in central obesity among Chinese adults with normal body mass index, 1993–2009. *BMC Public Health*. 2013;13:327.
- Fan JG, Zhu J, Li XJ, et al. Fatty liver and the metabolic syndrome among Shanghai adults. *J Gastroenterol Hepatol*. 2005;20:1825–1832.
- Li H, Wang YJ, Tan K, et al. Prevalence and risk factors of fatty liver disease in Chengdu, Southwest China. *Hepatobiliary Pancreat Dis Int*. 2009;8:377–382.
- Zhou YJ, Li YY, Nie YQ, et al. Prevalence of fatty liver disease and its risk factors in the population of South China. *World J Gastroenterol*. 2007;13:6419–6424.
- Browning JD, Szczepaniak LS, Dobbins R, et al. Prevalence of hepatic steatosis in an urban population in the United States: impact of ethnicity. *Hepatology*. 2004;40:1387–1395.
- Williams CD, Stengel J, Asike MI, et al. Prevalence of nonalcoholic fatty liver disease and nonalcoholic steatohepatitis among a largely middle-aged population utilizing ultrasound and liver biopsy: a prospective study. *Gastroenterology*. 2011;140:124–131.
- Liao D, Tan H, Hui R, et al. Hyperhomocysteinemia decreases circulating high-density lipoprotein by inhibiting apolipoprotein A-I protein synthesis and enhancing HDL cholesterol clearance. *Circ Res*. 2006;99:598–606.
- Shai I, Stampfer MJ, Ma J, et al. Homocysteine as a risk factor for coronary heart diseases and its association with inflammatory biomarkers, lipids and dietary factors. *Atherosclerosis*. 2004;177:375–381.
- Marcus J, Sarnak MJ, Menon V. Homocysteine lowering and cardiovascular disease risk: lost in translation. *Can J Cardiol*. 2007;23:707–710.
- Mateuszuk Ł, Khomich TI, Słominska E, et al. Activation of nicotinamide N-methyltransferase and increased formation of 1-methylnicotinamide (MNA) in atherosclerosis. *Pharmacol Rep*. 2009;61:76–85.
- Peng Y, Sartini D, Pozzi V, Wilk D, Emanuelli M, Yee VC. Structural basis of substrate recognition in human nicotinamide N-methyltransferase. *Biochemistry*. 2011;50:7800–7808.
- Houtkooper RH, Canó C, Wanders RJ, Auwerx J. The secret life of NAD<sup>+</sup>: an old metabolite controlling new metabolic signaling pathways. *Endocr Rev*. 2010;31:194–223.
- Kavanagh K, Jones KL, Sawyer J, et al. Trans fat diet induces abdominal obesity and changes in insulin sensitivity in monkeys. *Obesity (Silver Spring)*. 2007;15:1675–1684.
- Oh K, Hu FB, Manson JE, Stampfer MJ, Willett WC. Dietary fat intake and risk of coronary heart disease in women: 20 years of follow-up of the nurses' health study. *Am J Epidemiol*. 2005;161:672–679.
- Malik VS, Pan A, Willett WC, Hu FB. Sugar-sweetened beverages and weight gain in children and adults: a systematic review and meta-analysis. *Am J Clin Nutr*. 2013;98:1084–1102.
